# Supplementary material for: The Impact of Dietary Factors on the Sleep of Athletically Trained Populations: A Systematic Review
Source: MDPI journal article supplement (doi:10.3390/nu14163271), 2022-08-10
Supplement: s1 [file s1]

**Supplementary Table S2. Quality Assessment**

| Author                                        | Validity Questions |   |   |   |   |   |   |   |   |    | Quality Rating |
|-----------------------------------------------|--------------------|---|---|---|---|---|---|---|---|----|----------------|
|                                               | 1                  | 2 | 3 | 4 | 5 | 6 | 7 | 8 | 9 | 10 |                |
| Ormsbee et al. (2016) <sup>76</sup>           | ●                  | ● | ● | ● | ● | ● | ● | ● | ● | ●  | ∅              |
| Black et al. (2018) <sup>75</sup>             | ●                  | ● | ● | ● | ● | ● | ● | ● | ● | ●  | ∅              |
| Shamloo et al. (2019) <sup>74</sup>           | ●                  | ● | ● | ● | ● | ● | ● | ● | ● | ●  | -              |
| Kasper et al. (2020) <sup>77</sup>            | ●                  | ● | ● | ● | ● | ● | ● | ● | ● | ●  | ∅              |
| Morehen et al. (2021) <sup>70</sup>           | ●                  | ● | ● | ● | ● | ● | ● | ● | ● | ●  | +              |
| Harnett et al. (2021) <sup>72</sup>           | ●                  | ● | ● | ● | ● | ● | ● | ● | ● | ●  | ∅              |
| Quero et al. (2021) <sup>73</sup>             | ●                  | ● | ● | ● | ● | ● | ● | ● | ● | ●  | +              |
| Wangdi et al. (2021) <sup>71</sup>            | ●                  | ● | ● | ● | ● | ● | ● | ● | ● | ●  | ∅              |
| MacInnis et al. (2020) <sup>43</sup>          | ●                  | ● | ● | ● | ● | ● | ● | ● | ● | ●  | ∅              |
| Oikawa et al. (2019) <sup>60</sup>            | ●                  | ● | ● | ● | ● | ● | ● | ● | ● | ●  | +              |
| Miles et al. (2021) <sup>61</sup>             | ●                  | ● | ● | ● | ● | ● | ● | ● | ● | ●  | ∅              |
| Ferguson et al. (2022) <sup>59</sup>          | ●                  | ● | ● | ● | ● | ● | ● | ● | ● | ●  | +              |
| Vandenbogaerde & Hopkins (2010) <sup>67</sup> | ●                  | ● | ● | ● | ● | ● | ● | ● | ● | ●  | ∅              |
| Miller et al. (2014) <sup>63</sup>            | ●                  | ● | ● | ● | ● | ● | ● | ● | ● | ●  | +              |
| Ali et al. (2015) <sup>68</sup>               | ●                  | ● | ● | ● | ● | ● | ● | ● | ● | ●  | ∅              |
| Dunican et al. (2018) <sup>64</sup>           | ●                  | ● | ● | ● | ● | ● | ● | ● | ● | ●  | +              |
| Ramos-Campo et al. (2019) <sup>65</sup>       | ●                  | ● | ● | ● | ● | ● | ● | ● | ● | ●  | +              |
| Raya-Gonzalez et al. (2021) <sup>69</sup>     | ●                  | ● | ● | ● | ● | ● | ● | ● | ● | ●  | ∅              |
| Caia et al. (2021) <sup>66</sup>              | ●                  | ● | ● | ● | ● | ● | ● | ● | ● | ●  | +              |
| Hoshikawa et al. (2018) <sup>81</sup>         | ●                  | ● | ● | ● | ● | ● | ● | ● | ● | ●  | ∅              |
| Knufinke et al. (2018) <sup>80</sup>          | ●                  | ● | ● | ● | ● | ● | ● | ● | ● | ●  | +              |
| Monma et al. (2018) <sup>78</sup>             | ●                  | ● | ● | ● | ● | ● | ● | ● | ● | ●  | ∅              |
| Silva & Paiva (2018) <sup>62</sup>            | ●                  | ● | ● | ● | ● | ● | ● | ● | ● | ●  | +              |
| Yasuda et al. (2019) <sup>83</sup>            | ●                  | ● | ● | ● | ● | ● | ● | ● | ● | ●  | ∅              |
| Monma et al. (2021) <sup>79</sup>             | ●                  | ● | ● | ● | ● | ● | ● | ● | ● | ●  | +              |
| Hoshino et al. (2022) <sup>82</sup>           | ●                  | ● | ● | ● | ● | ● | ● | ● | ● | ●  | +              |
| Moss et al. (2022) <sup>84</sup>              | ●                  | ● | ● | ● | ● | ● | ● | ● | ● | ●  | +              |
| Tinsley et al. (2019) <sup>85</sup>           | ●                  | ● | ● | ● | ● | ● | ● | ● | ● | ●  | +              |
| Louis et al. (2016) <sup>55</sup>             | ●                  | ● | ● | ● | ● | ● | ● | ● | ● | ●  | +              |
| Killer et al. (2017) <sup>56</sup>            | ●                  | ● | ● | ● | ● | ● | ● | ● | ● | ●  | +              |
| Leyh et al. (2018) <sup>58</sup>              | ●                  | ● | ● | ● | ● | ● | ● | ● | ● | ●  | +              |
| Vlahoyiannis et al. (2018) <sup>57</sup>      | ●                  | ● | ● | ● | ● | ● | ● | ● | ● | ●  | +              |
| Daniel et al. (2019) <sup>40</sup>            | ●                  | ● | ● | ● | ● | ● | ● | ● | ● | ●  | +              |
| Falkenberg et al. (2021) <sup>37</sup>        | ●                  | ● | ● | ● | ● | ● | ● | ● | ● | ●  | +              |
| Condo et al. (2022) <sup>54</sup>             | ●                  | ● | ● | ● | ● | ● | ● | ● | ● | ●  | +              |

Quality rating symbols indicate a positive (+), neutral (∅), or negative (-) study rating.
